# Supplementary figures and images for: Responses of dissolved organic carbon to freeze-thaw cycles associated with the changes in microbial activity and soil structure
Source: Copernicus journal article supplement (doi:10.5194/tc-2023-3), 2023-02-07

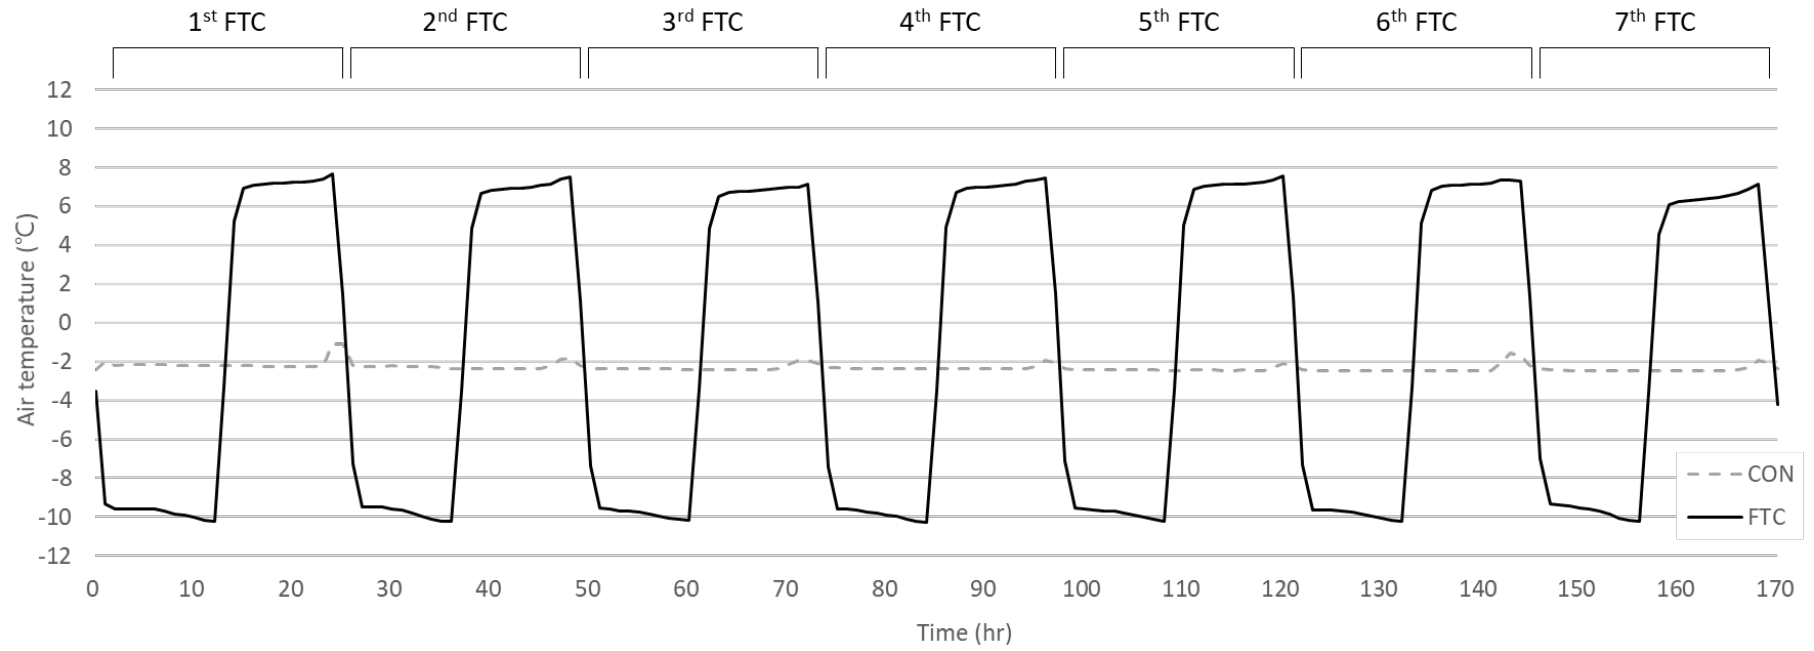

**Figure S1. Air temperature during the freeze-thaw cycles (FTCs).**

Supplement: Supplementary file 1 [file tc-2023-3-supplement.pdf]
